# Supplementary material
Source: PubMed Central journal article supplement (PMC1458936)

**A**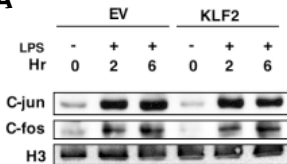**C**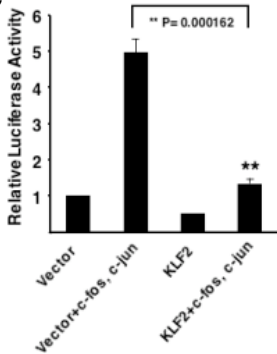**B**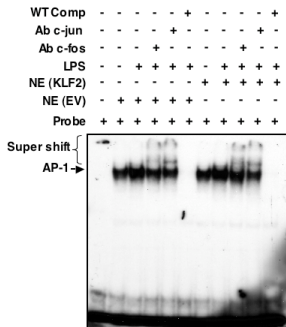**D**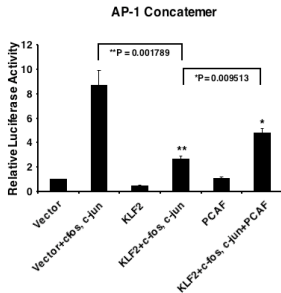

Supplement: pnas_0508235103_1.pdf [file pnas_0508235103_1.pdf]
